# Supplementary material for: Ameloblastoma RNA profiling uncovers a distinct non-coding RNA signature
Source: PubMed Central journal article supplement (PMC5354851; doi:10.18632/oncotarget.13889), 2016-12-10
Supplement: oncotarget-08-4530-s001.pdf [file oncotarget-08-4530-s001.pdf]

## **Ameloblastoma RNA profiling uncovers a distinct noncoding RNA signature**

### **Supplementary Materials**

**Supplementary Table S1: Significantly up-and down-regulated protein-coding genes in ameloblastoma.** See [Supplementary\\_Table\\_S1](#)
